# Supplementary material for: Neutrophil mobilization via plerixafor-mediated CXCR4 inhibition arises from lung demargination and blockade of neutrophil homing to the bone marrow
Source: PubMed Central journal article supplement — J Exp Med. 2013 Oct 21;210(11):2321–36. doi: 10.1084/jem.20130056 (PMC3804935; doi:10.1084/jem.20130056), 2013-10-21
Supplement: supp_jem.20130056_JEM_20130056_sm.pdf [file supp_jem.20130056_JEM_20130056_sm.pdf]

## SUPPLEMENTAL MATERIAL

Devi et al., <http://www.jem.org/cgi/content/full/jem.20130056/DC1>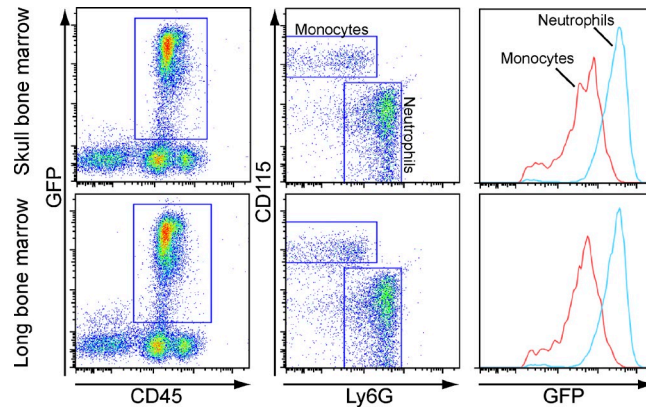

**Figure S1. Assessment of leukocyte GFP expression in the BM of LysM-GFP mice.** A representative flow cytometry plot showing the GFP expression of monocytes and neutrophils in the skull BM (top) and tibial BM (bottom) of LysM-GFP mice. The dot plots depict the gating strategy. Histograms show that monocytes (CD115<sup>+</sup>Ly6G<sup>-</sup>, red lines) have lower GFP intensity than neutrophils (CD115<sup>-</sup>Ly6G<sup>+</sup>, blue lines). Data were obtained from three independent experiments. As shown here, neutrophils constitute the major population of these GFP<sup>+</sup> cells (>70%), and they have the highest GFP expression. Consequently, neutrophils can be easily distinguished from other myelomonocytic cell types based on their high GFP intensity.

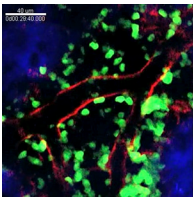

**Video 1. Neutrophil behavior in the skull BM.** A time-lapse image sequence of maximum intensity projection depicting the migratory behavior of GFP<sup>+</sup> neutrophils in the skull bone of chimeric mice (LysM-GFP BM into irradiated mT mice) under homeostatic conditions. White box indicates a region of interest, which shows GFP<sup>+</sup> neutrophils (arrows) migrating across sinusoid wall (red) to enter into circulation. Blue signals represent second harmonic generation from the bone collagen. Elapsed time is shown in hours:minutes:seconds.

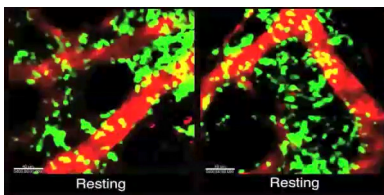

**Video 2. Dynamic behavior of neutrophil in the BM in response to G-CSF or plerixafor treatment.** Time-lapse image sequences of maximum intensity projection depicting the migratory behavior of GFP<sup>+</sup> neutrophils in response to G-CSF or plerixafor treatment. Sinusoids are labeled with intravenous injection of 155 kD TRITC-conjugated dextran. The first 10 min of video demonstrates the basal neutrophil activity. Left, within 30 min after G-CSF treatment, neutrophils could be seen to migrate toward the BM sinusoid and being released into the circulation. Right, plerixafor does not alter the motility pattern of GFP<sup>+</sup> neutrophils in the BM. White box indicates a region of interest. Elapsed time is shown in hours:minutes:seconds.

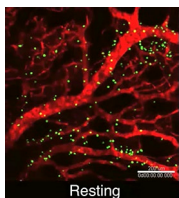

**Video 3. G-CSF increases neutrophil egress from the BM.** A time-lapse image sequence of maximum intensity projection depicting the migratory behavior of transferred GFP<sup>+</sup> neutrophils in response to G-CSF treatment. Sinusoids are labeled with intravenous injection of 155 kD TRITC-conjugated dextran. G-CSF treatment increases neutrophil motility and egress from the BM. White arrows indicates representative egressing neutrophils. Elapsed time is shown in hours:minutes:seconds.

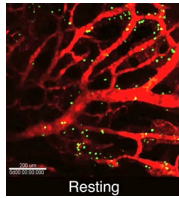

**Video 4. Plerixafor does not increase the number of neutrophil egress from the BM.** A time-lapse image sequence of maximum intensity projection depicting the migratory behavior of transferred GFP<sup>+</sup> neutrophils in response to plerixafor treatment. Sinusoids are labeled with intravenous injection of 155 kD TRITC-conjugated dextran. Plerixafor treatment does not alter neutrophil egress from the BM. White arrows indicate egressing neutrophils. Elapsed time is shown in hours:minutes:seconds.

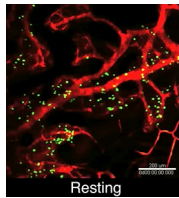

**Video 5. Basal levels of neutrophil egress from the BM.** A time-lapse image sequence of maximum intensity projection depicting the migratory behavior of transferred GFP<sup>+</sup> neutrophils under resting state (PBS treated). Sinusoids are labeled with intravenous injection of 155 kD TRITC-conjugated dextran. White arrows indicate egressing neutrophils. Elapsed time shown is hours:minutes:seconds.

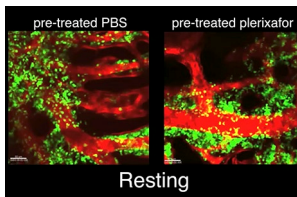

**Video 6. Plerixafor pretreatment augments KC-induced neutrophil egress from the BM.** A time-lapse image sequence of maximum intensity projection depicting the migratory behavior of GFP<sup>+</sup> neutrophils in response to KC injection in a 1-h PBS- (control) or plerixafor-pretreated mouse. Sinusoids are labeled with intravenous injection of 155 kD TRITC-conjugated dextran. Elapsed time is shown in hours:minutes:seconds.

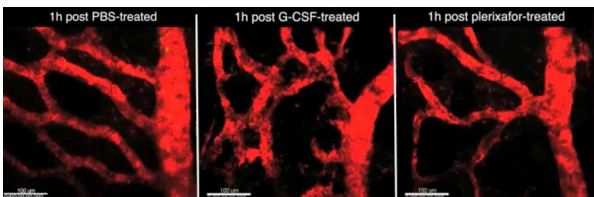

**Video 7. Neutrophil trafficking to the BM.** Time-lapse sequences of maximum intensity projection depicting the cellular behavior of transferred GFP<sup>+</sup> neutrophils in the BM of a PBS-treated, G-CSF-, and plerixafor-treated mice. Sinusoids are labeled with intravenous injection of 155 kD TRITC-conjugated dextran. GFP<sup>+</sup> transferred neutrophils (white arrows) can be seen to adhere to the luminal surface of BM endothelium followed by transmigration into the marrow space in PBS- and G-CSF-treated mice. Elapsed time shown is hours:minutes:seconds.

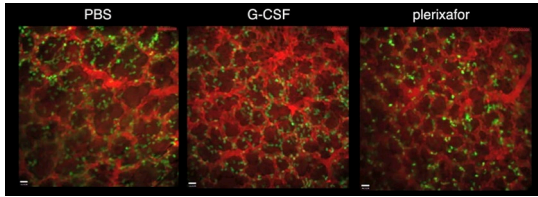

**Video 8. Intravital imaging of neutrophils in the lung.** Time-lapse image sequences depicting the cellular behavior of GFP<sup>+</sup> neutrophils in the lung of control (PBS-treated), G-CSF-treated, or plerixafor-treated mice. Blood vessels are labeled with intravenous injection of Alexa Fluor 647-conjugated BSA. Images were captured over a period of 5 min.

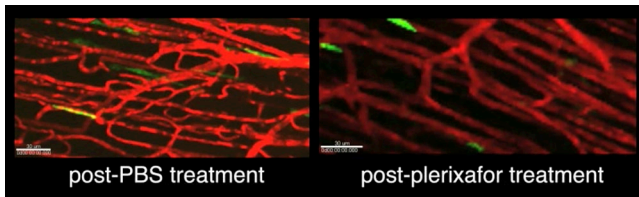

**Video 9. Intravital imaging of neutrophils in skeletal muscle.** Time-lapse sequences of maximum intensity projection depicting the behavior of GFP<sup>+</sup> neutrophils in LysM-GFP mice in response to PBS (control) or plerixafor treatment. Vasculature is labeled with intravenous injection of Evan's blue. Elapsed time is shown in hours:minutes:seconds.
